# Supplementary material
Source: Springer Nature journal article supplement (https://www.springermedizin.de/resource/supplementary/12885_2014_4803_MOESM3_ESM.pdf/9467336)

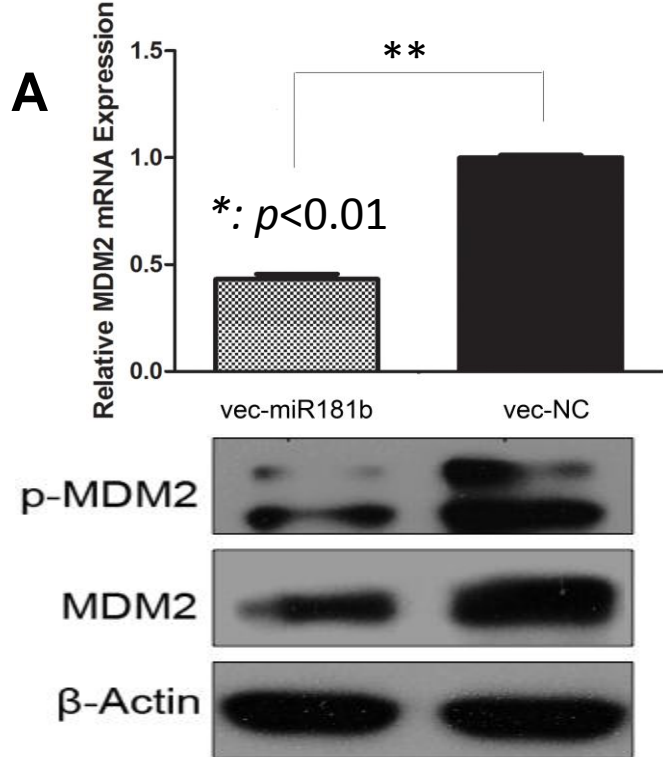

**B**

Binding site position 3491-3497 of MDM2 3'UTR 5'...CUAUAGUUA AUGUAU **UGAAUGUU**...3'

| | | | |

miR-181b 3'...UGGGUGGCUGUCGUUACUUACAA...5'

mMDM2 3'UTR 5'...CUAUAGUUA AUGUAU **CCUGAUCU**...3'

: : : : :

miR-181b 3'...UGGGUGGCUGUCGUUACUUACAA...5'

**C**

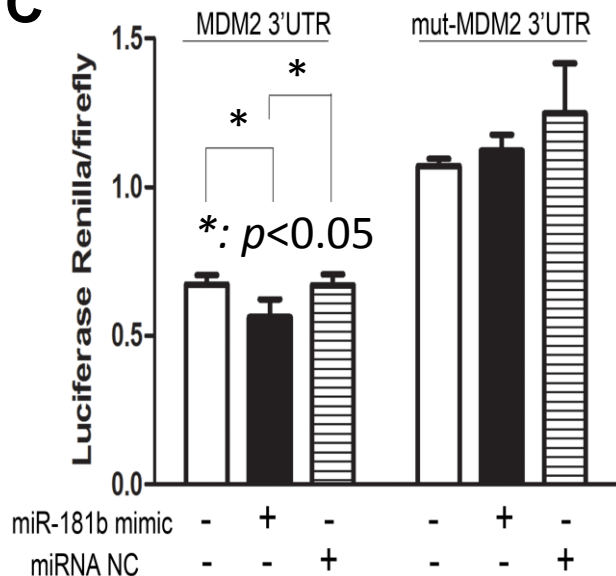

Supplement: MOESM3 [file 9467336]
